# Supplementary material for: Experimental Design Modelling and Optimization of Triazine Herbicides Removal With Reduced Graphene Oxide Using Response Surface Method
Source: Research Square preprint supplement (doi:10.21203/rs.3.rs-165892/v1), 2021-02-09
Supplement: Supplementary file 1 [file f55cdf6d62db386df80d872d.docx]

**Supporting Information File**

**Experimental design modelling and optimization of triazine herbicides removal with reduced graphene oxide using response surface method**

**Authors:** Martina Foschia, Paola Capassoa, Maria Anna Maggib, Fabrizio Ruggieria and Giulia Fioravantia*

a) University of L’Aquila, Department of Physical and Chemical Sciences, Via Vetoio, Coppito, L'Aquila 67100, Italy.

b) Hortus Novus, Via Aldo Moro 28 D, L'Aquila, 67100, Italy

*Corresponding authors

E-mail: [giulia.fioravanti@univaq.it](mailto:giulia.fioravanti@univaq.it)

Department of Physical and Chemical Sciences

University of L’Aquila

Via Vetoio – 67100 L’Aquila (AQ) – Italy

Tel. +39-0862-434244


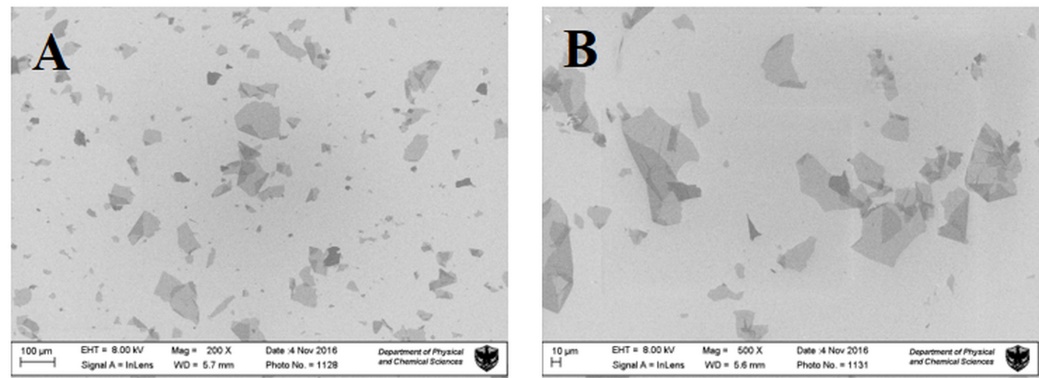


**Figure S01** SEM images of GO sheets at different magnification





**Figure S02** FTIR spectrum of pristine GO


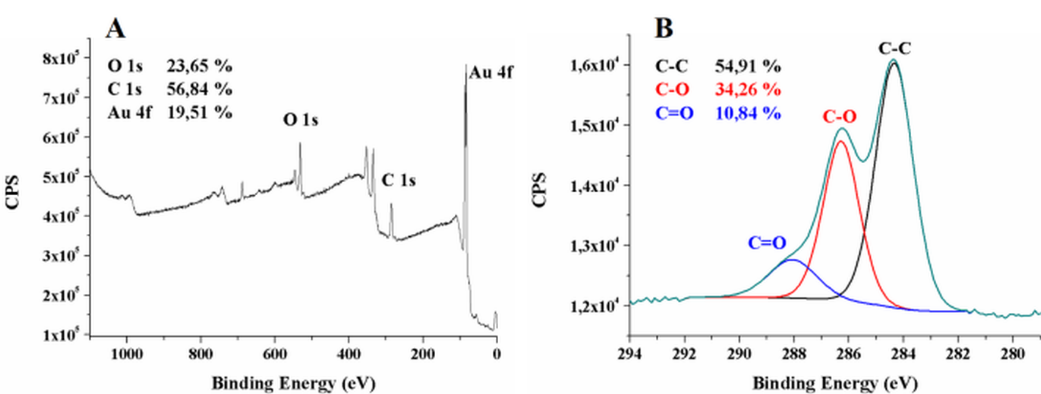


**Figure S03** XPS survey of GO (A) and C1s region (B)
